# Supplementary material
Source: PubMed Central journal article supplement (PMC2940466)

**Supplemental Fig.1. (A)** Immunostaining of glucagon in 3-6 months old control and *Arx* deficient stomach. **(B-C)** Pancreatic polypeptide (red) and insulin (green) expression in islets of 2 week and 3-6 month old control and *Arx* deficient mice.

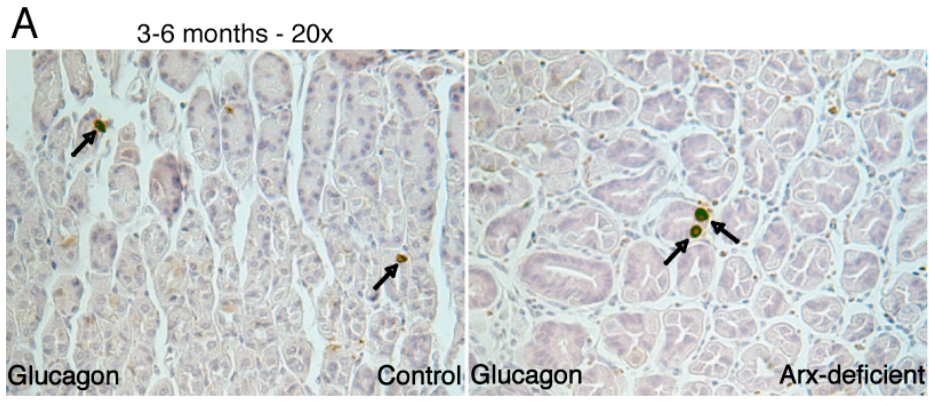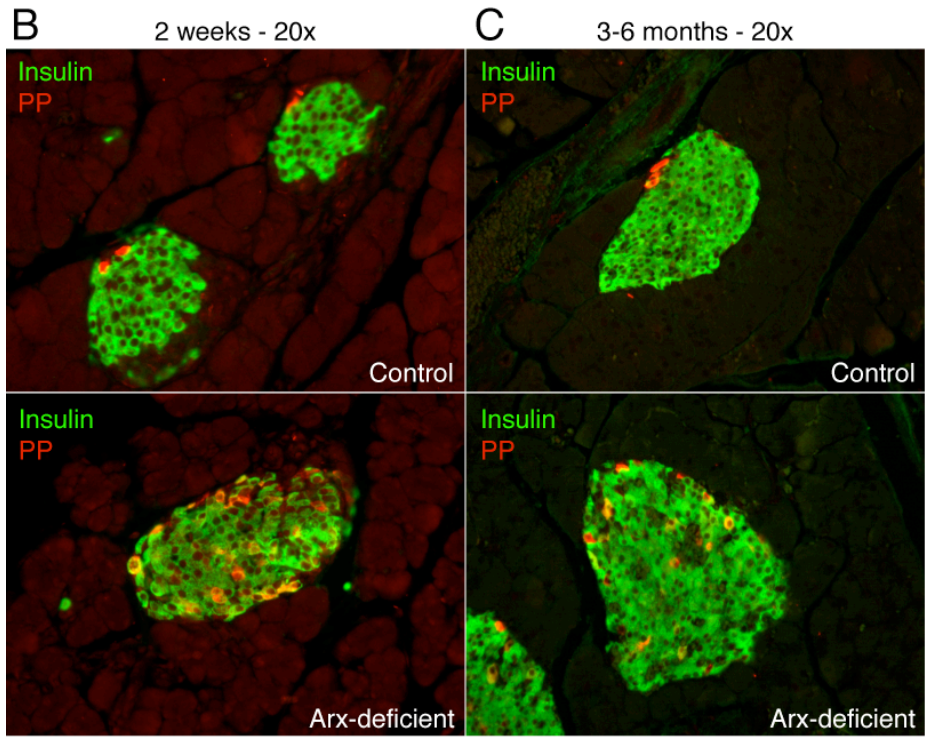

Supplement: me.2010-0120_1.pdf [file me.2010-0120_1.pdf]
